# Supplementary material for: Carboxylate Ligands-Promoted Superior Electrocatalytic Performance for Oxygen Evolution Reaction and Their Mechanisms
Source: Research Square preprint supplement (doi:10.21203/rs.3.rs-154877/v1), 2021-02-08
Supplement: Supplementary file 1 [file 8a0088b9637ee6b17b97da01.docx]

**Supporting Information**

**Carboxylate Ligands-Promoted Superior Electrocatalytic Performance for Oxygen Evolution Reaction and Their Mechanisms**

**Figure S1**. a-h)SEM images of NiFe-LDHs,NiCo-LDHs, NiCu-LDHs, NiV-LDHs, CoV-LDHs, CoFe-LDHs, NiMn- LDHs and NiFeMn-LDHs.

**Figure S2**. Theoretical atomic structure models of NiFe-LDHs/CLs-PLA from different angles.

**Figure S3**.Theoretical atomic structure models of NiFe-LDHs/CLs-PVA from different angles.

**Figure S4**. Theoretical atomic structure models of NiFe-LDHs/CLs-CVA from different angles.

**Figure S5**. a) Original structural model of NiFe-LDHs/CLs; b-c) OER processes.

**Figure S6**. Schematical diagram of inducing downshift of metal d-band to penetrate p-band of oxygen intermediates.

**Figure S7**. XRD patterns of NiFeMn-MOFs.

The XRD pattern of NiFeMn-MIL53 suggests that it is isostructural to the previously reported Ni-based MOFs (no. 985792, space group of C2/m, Cambridge Crystallographic Data Centre), which are in good agreement with the simulated patterns, in which four reflections are assigned to the (200), (001), (201) and (201) crystallographic planes, respectively. In addition, the peaks at 44.2, 51.3 and 76.1 are attribute to the (111), (200) and (220) lattice facets for Ni (No: 04-0850).

**Figure S8**. a) SEM image of NiFeMn-MOFs; b and c) HRTEM images of NiFeMn-MOFs; d-j) HADDF-TEM image of NiFeMn-MOF and corresponding elements mappings of Ni, Fe, Mn and O.

Transmission electron microscopy(TEM) and scanning electron microscopy(SEM) images show a stacked nanosheet morphology assembling on surface of 3D Ni foam. Energy-dispersive X-ray spectroscopy (EDS) elemental mappings confirm that the as-synthesized NiFeMn-MOFs possess homogeneous distributions of C, O, Ni, Fe and Mn elements.

**Figure S9**. a) FT-IR patterns of NiFeMn-MOFs and TPA; b) Raman patterns of NiFeMn-MOFs and TPA.

Specific functional groups of NiFeMn-MOFs were characterized by Fourier transform infrared (FT-IR) spectroscopy and Raman patterns. Notably, the IR spectrum of NiFeMn-MOFs exhibits the absence of typical absorption peaks related to the undissociated hydroxyl and carboxylic acid groups in the range of 1600-3500 cm-1, reflecting that each hydroxyl and carboxylic acid group has been deprotonated in NiFeMn-MOFs, which can be further confirmed by the absence of adsorption bands at 1685 cm−1 compared to pure terephthalic acid ligand. This difference demonstrates the absence of free ligand in the as-obtained NiFeMn-MOFs. Additionally, two distinct peaks at 1579 cm−1 and 1368 cm−1 can be clearly observed and assigned to the symmetric and asymmetric vibrations, respectively. The peak at approximately 1500 cm-1 is attributed to the stretching vibration of carbon hydrogen (C-H) of the benzene rings. The peak at 473 cm-1 indicates the formation of a metal-oxygen bond between the Ni/Fe/Mn atoms and carboxylic group in terephthalic acid (TPA) ligand. Combining the information derived from FT-IR results, it can be concluded that there was no uncoordinated carboxylate group exposing on the surface of NiFeMn-MOFs. The Raman spectrum of NiFeMn-MOF further presents two new peaks at 1607 and 1438 cm-1, which are associated with the in- and out-of- phase stretching modes of the carboxylate group, while the other peaks can be ascribed to C-H stretching region of the benzene ring.

**Figure S10**. a) SEM image of NiFeMn-MOFs after 1000 cycles; b) and c) High-resolution TEM images of NiFeMn- MOFs after 1000 cycles; d) SEM image of NiFe-MOFs after 1000 cycles; e) and f) HRTEM images of NiFe-MOFs after 1000 cycles.

**Figure S11**.a)FT-IR patterns of NiFeMn-MOFs before and after 1000 cycles; b)UV-vis spectra of electrolyte after 1000cycles for NiFeMn-MOFs and NiFe MOFs.

The stability of ligand in crystal frameworks was investigated by experiments. For comparison, the NiFe-MOF was evaluated under the same conditions. As shown in Figure S10a-c, after 1000 cyclic voltammetry cycles at a large current density of 100 mA cm–2, the NiFeMn-MOF can still remain initial morphology, and the ultrasmall metal (Ni/Fe/Mn) (oxy)hydroxides nanoparticles with about 2 nm uniformly distributed on the surface of framework. Because the nanosize of the active species can be effectively controlled by leveraging the space confinement effect within the two-dimensional organic ligand layers. However, NiFe-MOF demonstrated dramatical degradation/collapse of metal-organic frameworks, and miserably left exfoliation-like nanosheet (Figure S10d) attributed to ligand dissolved into the electrolyte during the partial metal ions transformed into the corresponding metal (oxy)hydroxides, especially at high catalytic current density, large oxygen gas stressed/departed and water molecules attacking. Obviously, due to the absence of partial ligand, the ultrasmall metal (oxy)hydroxides nanoparticles tented to be aggregated and even up to the average size of 8 nm as shown in Figure S10e-f.

To further demonstrate whether the ligand existed in NiFeMn-MOF after long-term operation, FTIR spectrum and UV/Vis spectroscopy analysis were conducted. As shown in Figure S11a, FTIR spectrum of posted-NiFeMn-MOF still demonstrated the clearly characteristic peaks of carboxylate ligands compared to the posted-NiFe-MOF, suggesting the robust catalytic stability derived from the presence of ligands retained NiFeMn-MOF. Furthermore, the electrolyte collected after 1000 cycles were analyzed by UV/Vis spectroscopy (Figure S11b). The peak intensity at 245 nm assigned to terephthalic ions from the NiFe-MOF increased, while NiFeMn-MOF shown little changed, suggesting the gradual release of ligands from the framework of NiFe-MOF during OER process.

**Figure S12**. a) XPS survey spectrum of NiFeMn-MOF; b) Ni 2p XPS spectrum, c) Fe 2p XPS spectrum, and d) Mn 2p XPS spectrum of NiFeMn-MOFs.

The XPS survey spectrum of NiFeMn-MOFs revealed the coexistence of Ni, Fe, Mn, O and C, and Ni/Fe/Mn atom ratio was around 7 : 3 : 1 (Figure S12a). High-resolution XPS spectrum of Ni 2p of NiFeMn-MOFs was presented in Figure S12b. The main two peaks at 855.5 eV (2p3/2) and 873.4 eV (2p1/2) can be assigned to Ni-O bond associated with Ni atoms and the organic ligands, while Ni-OH species is ascribed to the binding energy peaks at 860.0 eV (2p3/2) and 874.8 eV (2p1/2) together with two satellite peaks at 861.8 and 880.0 eV. In addition, high-resolution XPS spectrum of Fe 2p of NiFeMn-MOFs shows two main peaks at 710.3 (Fe 2p3/2) and 723.8 eV (Fe 2p1/2) with two satellite peaks at 714.5 and 728.1 eV (Figure S12c). In the case of Mn 2p spectrum (Figure S12d), two major peaks at 642.0 and 653.5 eV, can be attributed to Mn 2p3/2 and Mn 2p1/2, respectively. The above two peaks can be further fitted into four subpeaks: the peaks at 641.3 and 652.5 eV are assigned to Mn2+, while the other two peaks at 644.0 and 654.4 eV can be attributed to Mn3+ cation.

**Figure S13**. Nyquist plots of various electrodes in 1.0 M KOH solution with a potential of 1.524 V (vs RHE) (inset is equivalent circuit used for fitting the Nyquist plots).

**Figure S14**. Ex situ Raman spectrum of NiFeMn-MOFs after OER.

**References**

1. Giannozzi P, Baroni S, Bonini N, et al. QUANTUM ESPRESSO: a modular and open-source software project for quantum simulations of materials[J]. Journal of physics: Condensed matter, 2009, 21(39): 395502.
2. Perdew J P, Burke K, Ernzerhof M. Generalized gradient approximation made simple[J]. Physical review letters, 1996, 77(18): 3865.
3. Cococcioni M, De Gironcoli S. Linear response approach to the calculation of the effective interaction parameters in the LDA+ U method[J]. Physical Review B, 2005, 71(3): 035105.
4. J. Rossmeisl, Z. W. Qu, H. Zhu, G. J. Kroes, J. K. Nørskov, *J. Electroanal. Chem.* **2007**, *607*, 83–89.
